# Supplementary material for: A thermal energy storage prototype using sodium magnesium hydride
Source: Royal Society of Chemistry journal article supplement (doi:10.1039/c8se00596f), 2019-01-01
Supplement: c8se00596f1.pdf [file c8se00596f1.pdf]

Electronic Supplemental Information for:

## A Thermal Energy Storage Prototype using Sodium Magnesium Hydride

Lucas Poupin,<sup>a</sup> Terry D. Humphries,<sup>a\*</sup> Mark Paskevicius,<sup>a</sup> and Craig E. Buckley<sup>a</sup>

a. Department of Physics and Astronomy, Fuels and Energy Technology Institute, Curtin University, GPO Box U1987, Perth, WA 6845, Australia

\* email: terry\_humphries81@hotmail.com

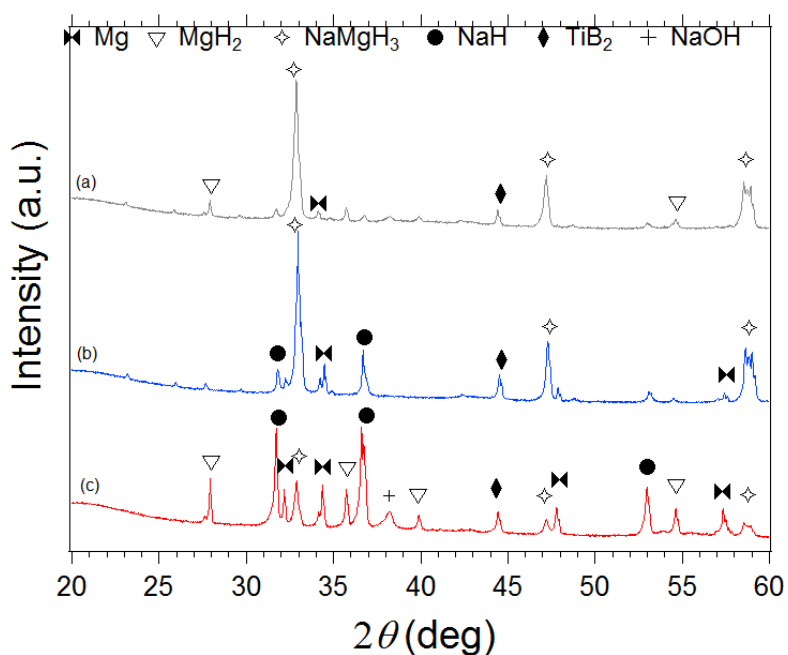

**Figure S1.** X-ray diffraction pattern of synthesised  $NaMgH_3$  after milling and annealing. (a) Ball-milled with a  $MgH_2$  precursor, (b) Ball-milled with a Mg precursor, (c) hand-ground with a Mg precursor.

XRD patterns of the  $NaMgH_3$  sample after cycling shows (Figure S2) that it remains stable, with minor formation of  $MgO$  (< 5 wt%). There is also a higher yield of  $NaMgH_3$  after cycling (89 %) demonstrating that cycling under these temperature and pressure conditions is sufficient.

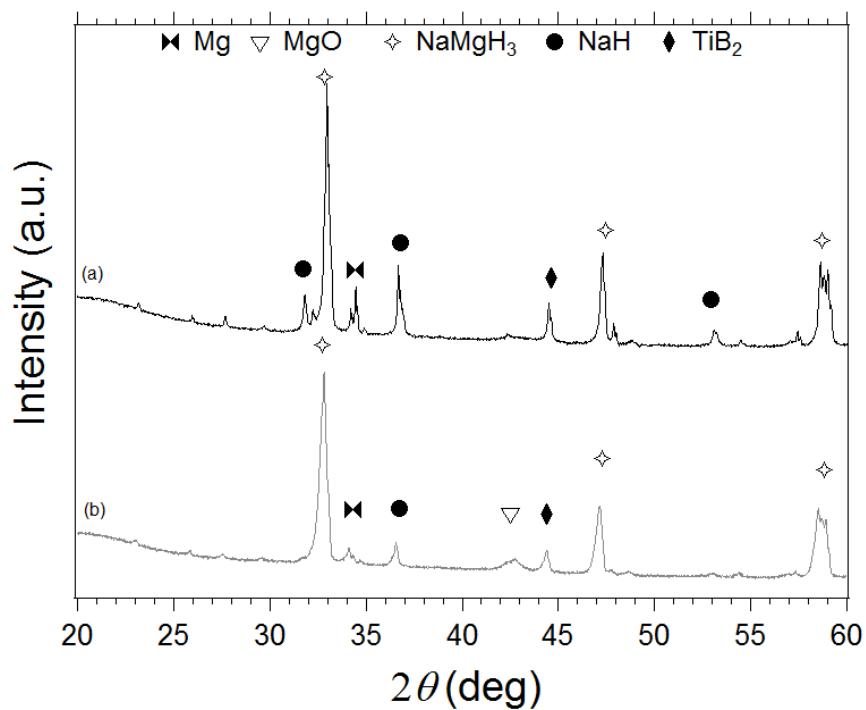

**Figure S2.** X-ray diffraction pattern of NaMgH<sub>3</sub> (and 2 mol% TiB<sub>2</sub>) (a) before and (b) after cycling 30 times between 400 °C and 465 °C.

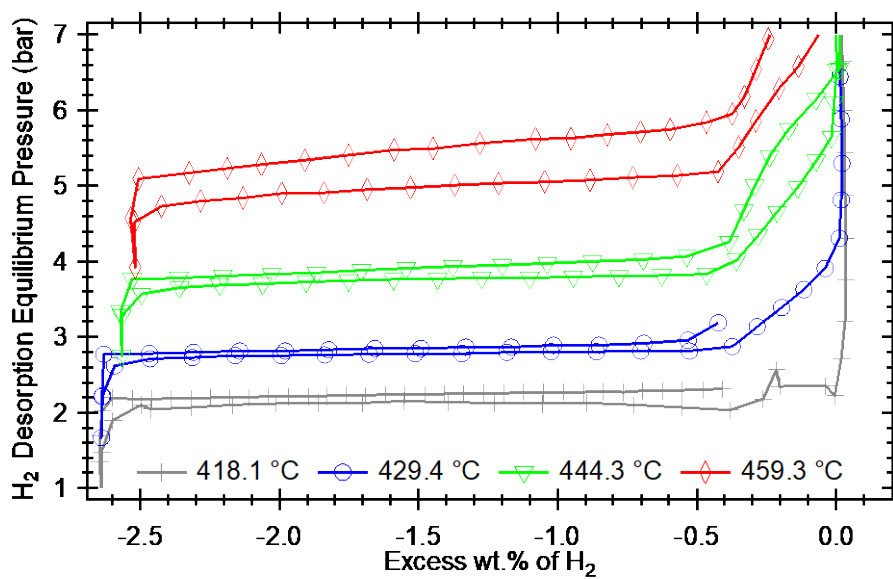

**Figure S3.** Pressure-Composition-Isotherms, absorption (top) and desorption (bottom), of reactor mix showing desorption and the following absorption.

A Van't Hoff plot is illustrated in Figure S3 by reporting the natural logarithm of the hydrogen pressure for 1.5 wt% of desorption over the inverse of temperature. A linear fit to the data allows the calculation of the entropy and enthalpy of formation.

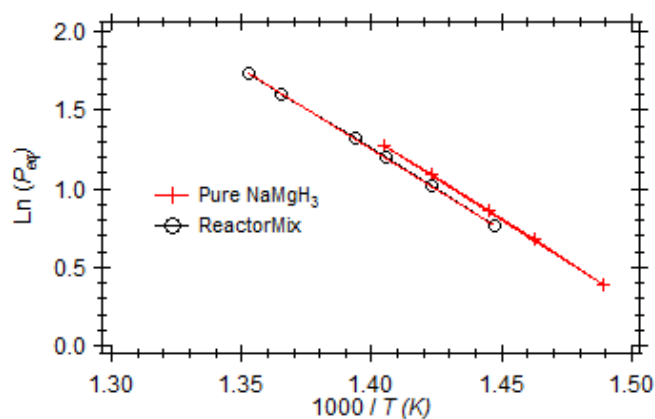

Figure S4. Van't Hoff plot for pristine NaMgH<sub>3</sub> and reactor mix.

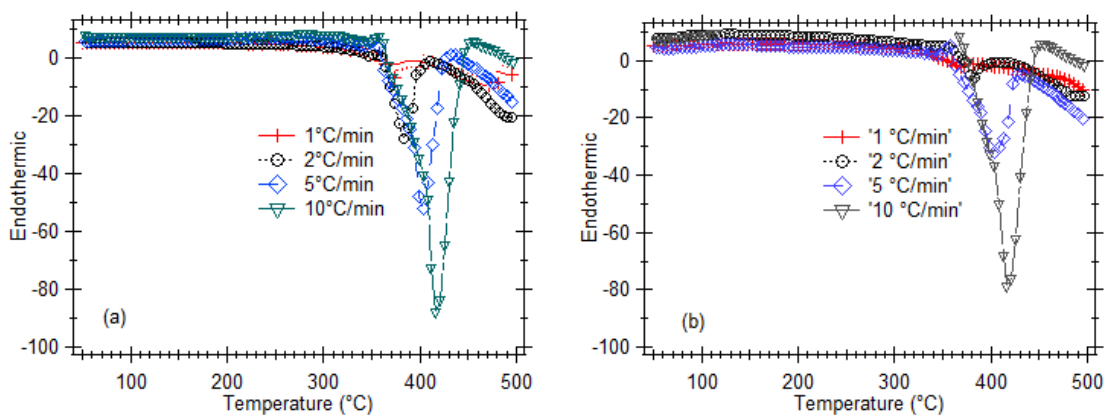

Figure S5. Differential scanning calorimetry of pristine (a) NaMgH<sub>3</sub> and (b) reactor mix, for different heating rates.

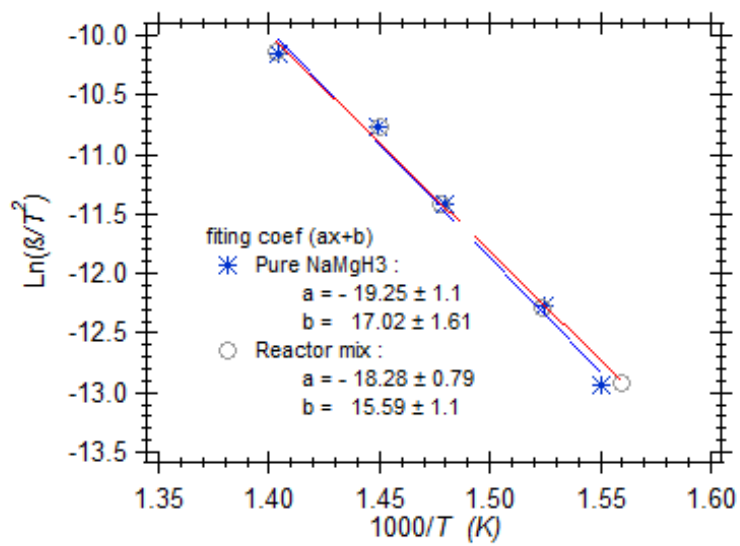

Figure S6. Kissinger plot for pure NaMgH<sub>3</sub> (blue stars), and reactor mix (black circle).
